# Supplementary material for: The proton-activated G protein-coupled receptor GPR4 regulates the development of osteoarthritis via modulating CXCL12/CXCR7 signaling
Source: PubMed Central journal article supplement (PMC8844071; doi:10.1038/s41419-021-04455-4), 2022-02-14

## Supplementary Materials

### **The Proton-Activated G Protein-Coupled Receptor GPR4 Regulates the Development of Osteoarthritis via Modulating CXCL12/CXCR7 Signaling**

Rong Li<sup>1#</sup>, Zijing Guan<sup>1#</sup>, Shuyan Bi<sup>1#</sup>, Fanhua Wang<sup>1,2</sup>, Liang He<sup>1,2</sup>, Xin Niu<sup>1</sup>, Yu You<sup>1</sup>, Yuwei Liu<sup>1</sup>, Yi Ding<sup>1</sup>, Stefan Siwko<sup>3</sup>, Ning Wang<sup>4</sup>, Ziming Zhang<sup>5\*</sup>, Yunyun Jin<sup>1\*</sup>, Jian Luo<sup>1,2\*</sup>

Supplementary Figure Legends

Supplementary Tables 1-3

Supplementary Figures 1-7

## Supplementary Figure Legends

### Supplementary Fig. 1 Overexpression of GPR4 in joints aggravated posttraumatic OA pathogenesis in mice.

(A) Schematic illustration of GPR4 overexpression by intra-articular (IA) injection of lentivirus. Four days after DMM surgery, 10-12-week-old C57/BL6J mice were IA injected with lentivirus expressing GPR4 (Lenti-Gpr4) or empty vector control (Lenti-Ctrl) every week. The joints were collected and subjected to H&E and IHC staining 8 weeks after DMM surgery.

(B) Representative images of IHC staining of GPR4 in articular cartilage and meniscus of wild type (WT) mice (10-12 weeks old) which were intra-articular (IA) injected with lentivirus expressing GPR4 (Lenti-Gpr4) or negative control empty lentivirus (Lenti-Ctrl). The mouse joints were injected two times per week. Eight weeks later, the joints were collected and subjected to IHC staining. n=7.

(C and D) Representative three-dimensional micro-CT images of the knee joints in sagittal view (C). The red arrows indicate osteophytes. Osteophyte formation was scored by assessing osteophyte size (D left) and maturity (D right). n = 7 mice per group. All data were presented as mean  $\pm$  s.d. \* p<0.05, \*\* p<0.01 using two-way ANOVA followed by Tukey's post hoc test.

**Supplementary Fig. 2 Characterization of GPR4 global knockout mice.**

(A) Schematic diagram of generation of *Gpr4* knockout mice. 176 bp in exon 2 of *Gpr4* was deleted using CRISPR/Cas9 technology. Strike-through indicates deleted nucleotides. The underlined nucleotides indicate guide RNA.

(B) Genotyping of GPR4 WT and KO mice, WT: 704bp, KO:528bp.

(C) IHC staining of GPR4 in the articular cartilage sections of 8-week-old WT and littermate GPR4 KO mice.

(D and E) Representative image of Safranin-O staining of the tibial growth plate from WT and littermate GPR4 KO mice (4-month-old) (D) and statistical analysis of the area of the growth plate using Image J software (E).  $n = 7$  mice. Data is expressed as mean  $\pm$  s.d. ns, no significant. Student's two-tailed  $t$  test was used for statistical analysis. Scale bars, 50  $\mu\text{m}$ .

**Supplementary Fig. 3 Ablation of GPR4 had little effect on osteophyte formation in post-traumatic and aging-associated OA mouse models.**

(A) Osteophyte formation was scored by assessing osteophyte size (left) and maturity (right) from WT mice ( $n = 7$  mice) and *Gpr4* KO littermate mice ( $n = 6$  mice). 8 weeks after DMM surgery, the mouse joints were collected and subjected to osteophyte score analysis. Data are expressed as mean  $\pm$  s.d. Student's two-tailed T test was used for statistical analysis.

(B) Osteophyte formation was scored by assessing osteophyte size (left) and maturity (right) from WT mice ( $n = 7$  mice) and *Gpr4* KO littermate mice ( $n = 4$  mice) at 12 months of age. Data are expressed as mean  $\pm$  s.d. Student's two-tailed T test was used for statistical analysis.

**Supplementary Fig. 4 GPR4 regulated the expression of matrix-degrading enzymes and inflammatory cytokines in chondrocytes.**

(A - C) The mRNA levels of *Mmp3*, *Mmp13*, *Nos2* and *Il-6* were quantified by qRT-PCR in primary chondrocytes from WT mice and *Gpr4 KO* mice (A), in ATDC5 cells, overexpressing GPR4 incubated with NE52-QQ57 (NE) for 24 hours (B) and in ATDC5 cells with or without GPR4 overexpression. The cells were stimulated with indicated concentrations of TNF- $\alpha$  for 24 hours (C). n = 3. All data are presented as mean  $\pm$  s.d. \*\* p<0.01, \*\*\* p<0.001, ns, no significant difference. Statistical analysis was performed using one-way ANOVA followed by Bonferroni's post hoc test for (B), two-way ANOVA followed by Tukey's post hoc test for (A) and (C).

(D) qRT-PCR analysis showing efficiency of *Gpr4* overexpression in ATDC5 cells.

**Supplementary Fig. 5 GPR4 regulates cartilage matrix anabolism in mouse chondrocytes.**

(A-C) Mouse primary chondrocytes from WT or littermate *Gpr4* KO mice were isolated, then the cells were micromass-cultured in chondrogenic differentiation medium for 3 days. The cells were subjected to Alcian blue staining (A) and quantified by Image J (B). qRT-PCR was used to determine expression of *Col2al*, *Acan* and *Sox9*(C). n = 3. Data are expressed as mean  $\pm$  s.d. \*\*P < 0.01, \*\*\* p<0.001 by unpaired two-tailed Student's T test.

**Supplementary Fig. 6 GPR4 regulated the expression of *Cxcl12* and *Cxcr7*.**

(A) Screening 22 different signaling pathway inhibitors for downregulation of GPR4-induced *Mmp3* expression. ATDC5 cells were transfected with empty vector or *Gpr4* expression construct, then stimulated with IL-1 $\beta$  (1 ng/ml) and different inhibitors for 24h. RNA was extracted and the expression level of *Mmp3* was examined by qPCR. The mRNA levels of *Mmp3* in ATDC5 cells from vector control (Vec) or *Gpr4* transfected cells (Left) and the ratio of *Mmp3* expression fold change in the *Gpr4* overexpression group versus the vector group following exposure to inhibitors (Right) are shown. The data are normalized to Vehicle. Red columns represent upregulated *Mmp3* expression with inhibitors versus Vehicle Control under IL-1 $\beta$  stimulation, and blue columns represent downregulated *Mmp3* expression with inhibitors versus Vehicle Control under IL-1 $\beta$  stimulation. Data are presented as mean  $\pm$  s.d. \*\*\* p<0.001, two-way ANOVA followed by Tukey's post hoc test was used for statistical analysis.

(B) The mRNA level of *Mmp3* in GPR4 overexpressing ATDC5 cells treated with the indicated concentrations of UNBS5162 for 24 hours in the presence of IL-1 $\beta$  was

determined. n = 3. Data are presented as mean  $\pm$  s.d. \*\*\* p<0.001, one-way ANOVA followed by Bonferroni's post hoc test was used for statistical analysis.

(C) The mRNA level of *Cxcl* family expression in ATDC5 cells transfected with vector or GPR4 for 48 hours. n = 6. Data are presented as mean  $\pm$  s.d. \*\*\* p<0.001, Student's two-tailed T test was used for statistical analysis.

(D) The mRNA levels of *Cxcr4* and *Cxcr7* in ATDC5 cells transfected with empty vector or Gpr4 expression construct, in the presence of IL-1 $\beta$  (1 ng/ml), TNF- $\alpha$  (10 ng/ml) and cultured at pH 7.2 or pH 6.5 for 12h, are shown. Data are presented as mean  $\pm$  s.d. \*\* p<0.01, \*\*\* p<0.001, two-way ANOVA followed by Tukey's post hoc test was used for statistical analysis.

#### **Supplementary Fig. 7 GPR4 regulated the MAPK/NF- $\kappa$ B signaling pathway.**

(A) The mRNA levels of *CXCL12* in intact and damaged regions of articular cartilage from OA patients were determined by qRT-PCR. n = 8. Data are expressed as mean  $\pm$  s.d. \*\*p < 0.01 by Student's two-tailed t test.

(B) Representative images of IHC staining of CXCR7 in intact and damaged regions of articular cartilage from human OA patients (left) and CXCR7 positive cells were quantified by IHC (right). Data are expressed as mean  $\pm$  s.d. \*\*\*p < 0.001 by Student's two-tailed t test. Scale bar, 50  $\mu$ m.

(C) qRT-PCR analysis showing *Cxcr7* silencing efficiency of siRNA targeting *Cxcr7* in ATDC5 cells. n =3. Data are presented as mean  $\pm$  s.d. \*\*\* p<0.001, one-way ANOVA followed by Bonferroni's post hoc test was used for statistical analysis.

## Supplementary Tables

**Supplementary Table 1: Information of the inhibitors used in this study**

| Number | Inhibitor Name            | Target of Signaling Pathway   |
|--------|---------------------------|-------------------------------|
| 1      | Vorinostat (SAHA, MK0683) | HDAC                          |
| 2      | YO-01027                  | Notch; $\gamma$ -secretase    |
| 3      | Staurosporine             | PKA; PKC                      |
| 4      | 3-TYP                     | SIRT3                         |
| 5      | UNBS5162                  | CXCR                          |
| 6      | JSH-23                    | NF- $\kappa$ B                |
| 7      | PD98059                   | MEK                           |
| 8      | CCG-63802                 | RGS Protein                   |
| 9      | Dorsomorphin              | AMPK, Autophagy               |
| 10     | SB-431542                 | ALK5/TGF- $\beta$ receptor    |
| 11     | JK184                     | Hedgehog                      |
| 12     | Levamlodipine besylate    | Calcium Channel               |
| 13     | Reversine                 | Aurora Kinase, Autophagy      |
| 14     | Pazopanib                 | c-Kit; FGFR; PDGFR; VEGFR     |
| 15     | GSK2879552                | Histone Demethylase           |
| 16     | U-73122                   | 5-Lipoxygenase; Phospholipase |
| 17     | Calcifediol (monohydrate) | vitamin D3                    |
| 18     | 3-Methyladenine           | PI3k, Autophagy               |
| 19     | Rapamycin                 | mTOR, Autophagy               |
| 20     | CWHM-12                   | Integrins                     |
| 21     | Olaparib                  | PARP                          |
| 22     | Uprosertib                | AKT                           |

**Supplementary Table 2. Characteristics of specimens from patients with OA**

| NO. | Age/gender | ICRS<br>Grade | Joint    | Use              |
|-----|------------|---------------|----------|------------------|
| 1   | 72/M       | 4             | Knee (L) | IHC/qPCR         |
| 2   | 76/M       | 4             | Knee (L) | IHC/qPCR         |
| 3   | 64/F       | 4             | Knee (L) | IHC/qPCR         |
| 4   | 67/F       | 4             | Knee (L) | IHC/qPCR         |
| 5   | 66/F       | 4             | Knee (R) | IHC/qPCR         |
| 6   | 63/F       | 4             | Knee (R) | IHC/qPCR         |
| 7   | 68/F       | 4             | Knee (R) | IHC/qPCR         |
| 8   | 71/F       | 4             | Knee (R) | IHC/qPCR         |
| 9   | 55/F       | 4             | Knee (R) | Explants culture |
| 10  | 71/F       | 4             | Knee (R) | Explants culture |
| 11  | 54/M       | 4             | Knee (L) | Explants culture |
| 12  | 74/F       | 4             | Knee (R) | Explants culture |
| 13  | 52/F       | 4             | Knee (R) | Explants culture |
| 14  | 59/F       | 4             | Knee (L) | Explants culture |

ICRS, International Cartilage Repair Society



**Supplementary Table 3. Primer sequences for qPCR**

| Gene   | Origin | Strand | Sequence                      | Purpose |
|--------|--------|--------|-------------------------------|---------|
| Gpr4   | Human  | S      | 5'GGTGAAACTCTTGCCTCGTC3'      | qPCR    |
|        |        | AS     | 5'CTCTTCCGAGACCGCTACAAC       |         |
| Col2a1 | Human  | S      | 5'TGGACGCCATGAAGGTTTTCT3'     | qPCR    |
|        |        | AS     | 5'TGGGAGCCAGATTGTCATCTC'      |         |
| Mmp3   | Human  | S      | 5'GACAAAGGATACAACAGGGACCAAT3' | qPCR    |
|        |        | AS     | 5'TGAGTGAGTGATAGAGTGGGTACAT3' |         |
| Mmp13  | Human  | S      | 5'TTGCAGAGCGCTACCTGAGATCAT3'  | qPCR    |
|        |        | AS     | 5'TTTGCCAGTCACCTCTAAGCCGAA3'  |         |
| GAPDH  | Human  | S      | 5'GGAGCGAGATCCCTCCAAAAT3'     | qPCR    |
|        |        | AS     | 5'GGCTGTTGTCATACTTCTCATGG3'   |         |
| Gpr4   | Mouse  | S      | 5'CTCTCTACATCTTCGTCATCGG3'    | qPCR    |
|        |        | AS     | 5'CGGTAGCACAGCAACATGAGTG      |         |
| Col2a1 | Mouse  | S      | 5'ACCTTGGACGCCATGAAAGT3'      | qPCR    |
|        |        | AS     | 5'CGGGAGGTCTTCTGTGATCG3'      |         |
| Mmp3   | Mouse  | S      | 5'TTGACTCAAGGGTGGATGCTGTCT3'  | qPCR    |
|        |        | AS     | 5'GCACATGCTGAACAAAGCACTTCC3'  |         |
| Mmp13  | Mouse  | S      | 5'GTGTGGAGTTATGATGATGT3'      | qPCR    |
|        |        | AS     | 5'TGCGATTACTCCAGATACTG3'      |         |
| GAPDH  | Mouse  | S      | 5'TGGCCTTCCGTGTTCCCTAC3'      | qPCR    |
|        |        | AS     | 5'GAGTTGCTGTTGAAGTCGCA3'      |         |
|        |        |        |                               |         |

|          |       |         |                                                             |      |
|----------|-------|---------|-------------------------------------------------------------|------|
| Sox9     | Mouse | S<br>AS | 5'AGTACCCGCATCTGCACAAC3'<br>5'ACGAAGGGTCTCTTCTCGCT3'        | qPCR |
| Aggrecan | Mouse | S<br>AS | 5'CCCAAGCACAGAGGTAAACAG3'<br>5'CTCACATTGCTCCTGGTCTG3'       | qPCR |
| NOS2     | Mouse | S<br>AS | 5'GTTCTCAGCCCAACAATACAAGA3'<br>5'GTGGACGGGTCGATGTCAC3'      | qPCR |
| IL-6     | Mouse | S<br>AS | 5'AGCCCACCAAGAACGATAGTC3'<br>5'GCATCAGTCCCAAGAAGGCA3'       | qPCR |
| Gpr4     | Mouse | S<br>AS | 5'GCTGGGCGTCTACCTGATG3'<br>5'AGGCGATGCTGATATAGATGTTG3'      | qPCR |
| Cxcr1    | Mouse | S<br>AS | 5' TCTGGACTAATCCTGAGGGTG3'<br>5' GCCTGTTGGTTATTGGA ACTCTC3' | qPCR |
| Cxcr2    | Mouse | S<br>AS | 5' ATGCCCTCTATTCTGCCAGAT3'<br>5' GTGCTCCGGTTGTATAAGATGAC3'  | qPCR |
| Cxcr3    | Mouse | S<br>AS | 5' TACCTTGAGGTTAGTGAACGTCA3'<br>5' CGCTCTCGTTTTCCCCATAATC3' | qPCR |
| Cxcr4    | Mouse | S<br>AS | 5' GACTGGCATAGTCGGCAATG3'<br>5' AGAAGGGGAGTGTGATGACAAA3'    | qPCR |
| Cxcr5    | Mouse | S<br>AS | 5' ATGAACTACCCACTAACCCTGG3'<br>5' TGTAGGGGAATCTCCGTGCT3'    | qPCR |
| Cxcr6    | Mouse | S<br>AS | 5' GAGTCAGCTCTGTACGATGGG3'<br>5' TCCTTGA ACTTTAGGAAGCGTTT3' | qPCR |
|          |       |         |                                                             |      |

|        |       |         |                                                             |      |
|--------|-------|---------|-------------------------------------------------------------|------|
| Cxcr7  | Mouse | S<br>AS | 5' AGCCTGGCAACTACTCTGACA3'<br>5' GAAGCACGTTCTTGTTAGGCA3'    | qPCR |
| Cxcl1  | Mouse | S<br>AS | 5' CTGGGATTCACCTCAAGAACATC3'<br>5' CAGGGTCAAGGCAAGCCTC3'    | qPCR |
| Cxcl2  | Mouse | S<br>AS | 5' CCAACCACCAGGCTACAGG3'<br>5' GCGTCACACTCAAGCTCTG3'        | qPCR |
| Cxcl3  | Mouse | S<br>AS | 5' CAAGAAGTTTGCCTCAACCCC3'<br>5' GACTTGCCGCTCTTCAGTATCT3'   | qPCR |
| Cxcl5  | Mouse | S<br>AS | 5' GTTCCATCTCGCCATTCATGC3'<br>5' GCGGCTATGACTGAGGAAGG3'     | qPCR |
| Cxcl9  | Mouse | S<br>AS | 5' GGAGTTCGAGGAACCCTAGTG3'<br>5' GGGATTTGTAGTGGATCGTGC3'    | qPCR |
| Cxcr10 | Mouse | S<br>AS | 5' CCAAGTGCTGCCGTCATTTTC3'<br>5' GGCTCGCAGGGATGATTTCAA3'    | qPCR |
| Cxcl11 | Mouse | S<br>AS | 5' GGCTTCCTTATGTTCAAACAGGG3'<br>5' GCCGTTACTCGGGTAAATTACA3' | qPCR |
| Cxcl12 | Mouse | S<br>AS | 5' TGCATCAGTGACGGTAAACCA3'<br>5' TTCTTCAGCCGTGCAACAATC3'    | qPCR |
| Cxcl13 | Mouse | S<br>AS | 5' GGCCACGGTATTCTGGAAGC3'<br>5' GGGCGTAACTTGAATCCGATCTA3'   | qPCR |
| Cxcl14 | Mouse | S<br>AS | 5' GAAGATGGTTATCGTCACCACC3'<br>5' CGTTCCAGGCATTGTACCACT3'   | qPCR |
|        |       |         |                                                             |      |

|        |       |    |                              |      |
|--------|-------|----|------------------------------|------|
| Cxcl15 | Mouse | S  | 5'CAAGGCTGGTCCATGCTCC3'      | qPCR |
|        |       | AS | 5' TGCTATCACTTCCTTTCTGTTGC3' |      |
| Cxcl16 | Mouse | S  | 5'CCTTGTCTCTTGCGTTCTTCC3'    | qPCR |
|        |       | AS | 5' TCCAAAGTACCCTGCGGTATC3'   |      |
| Cxcl17 | Mouse | S  | 5'AGGTGGCTCTTGGAAGGTG3'      | qPCR |
|        |       | AS | 5' GGTGACATCGTTTGAGAAATTGC3' |      |

S, sense; AS, antisense

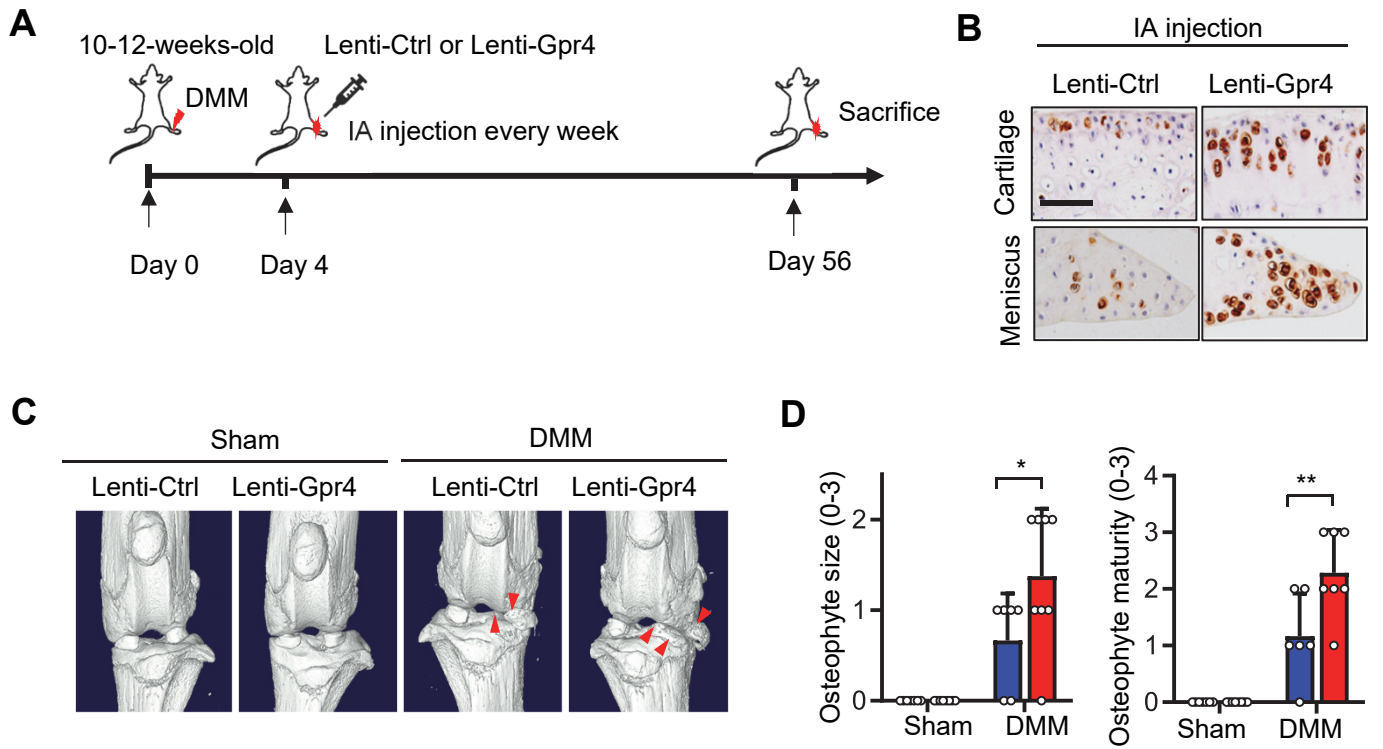

**A**

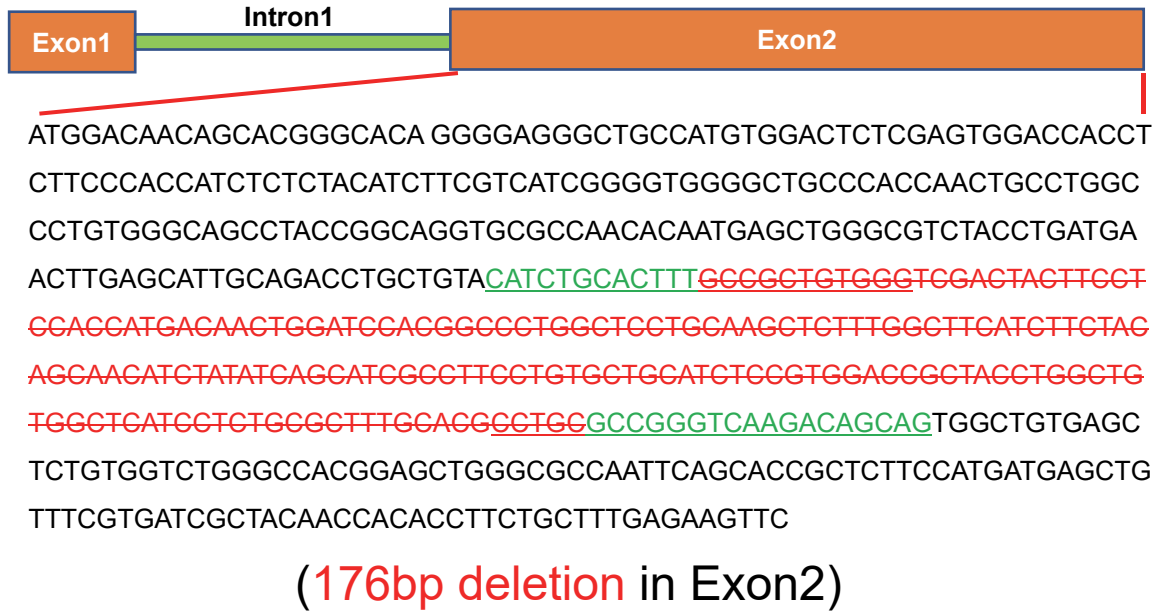

**B**

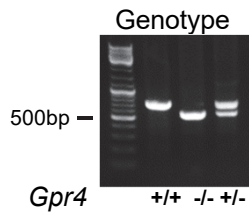

**C**

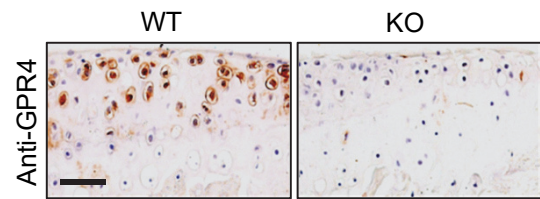

**D**

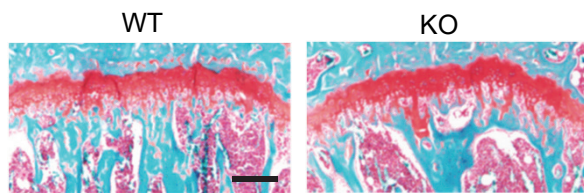

**E**

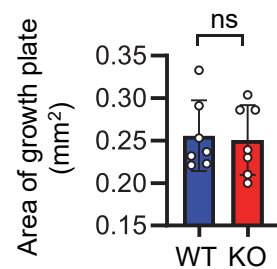

Li et al., Supplementary Fig. 3

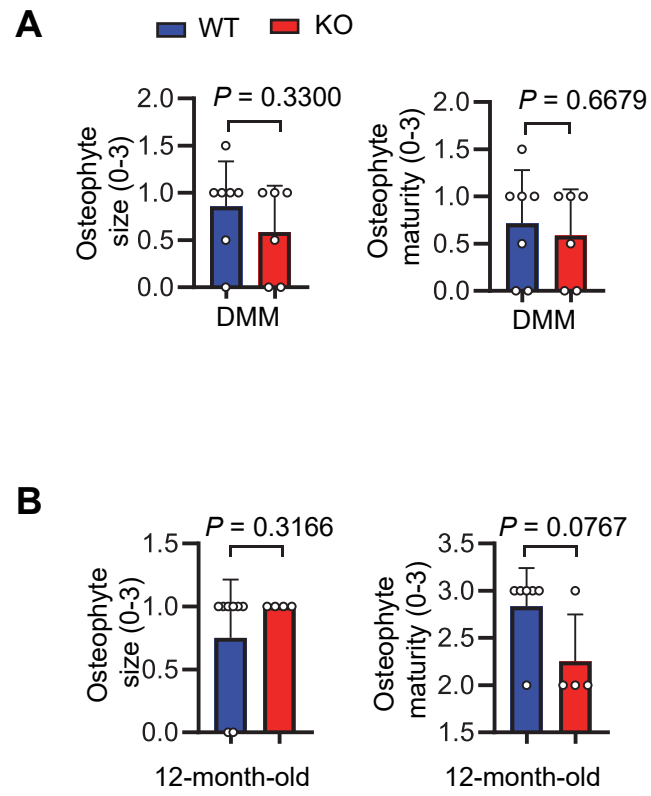

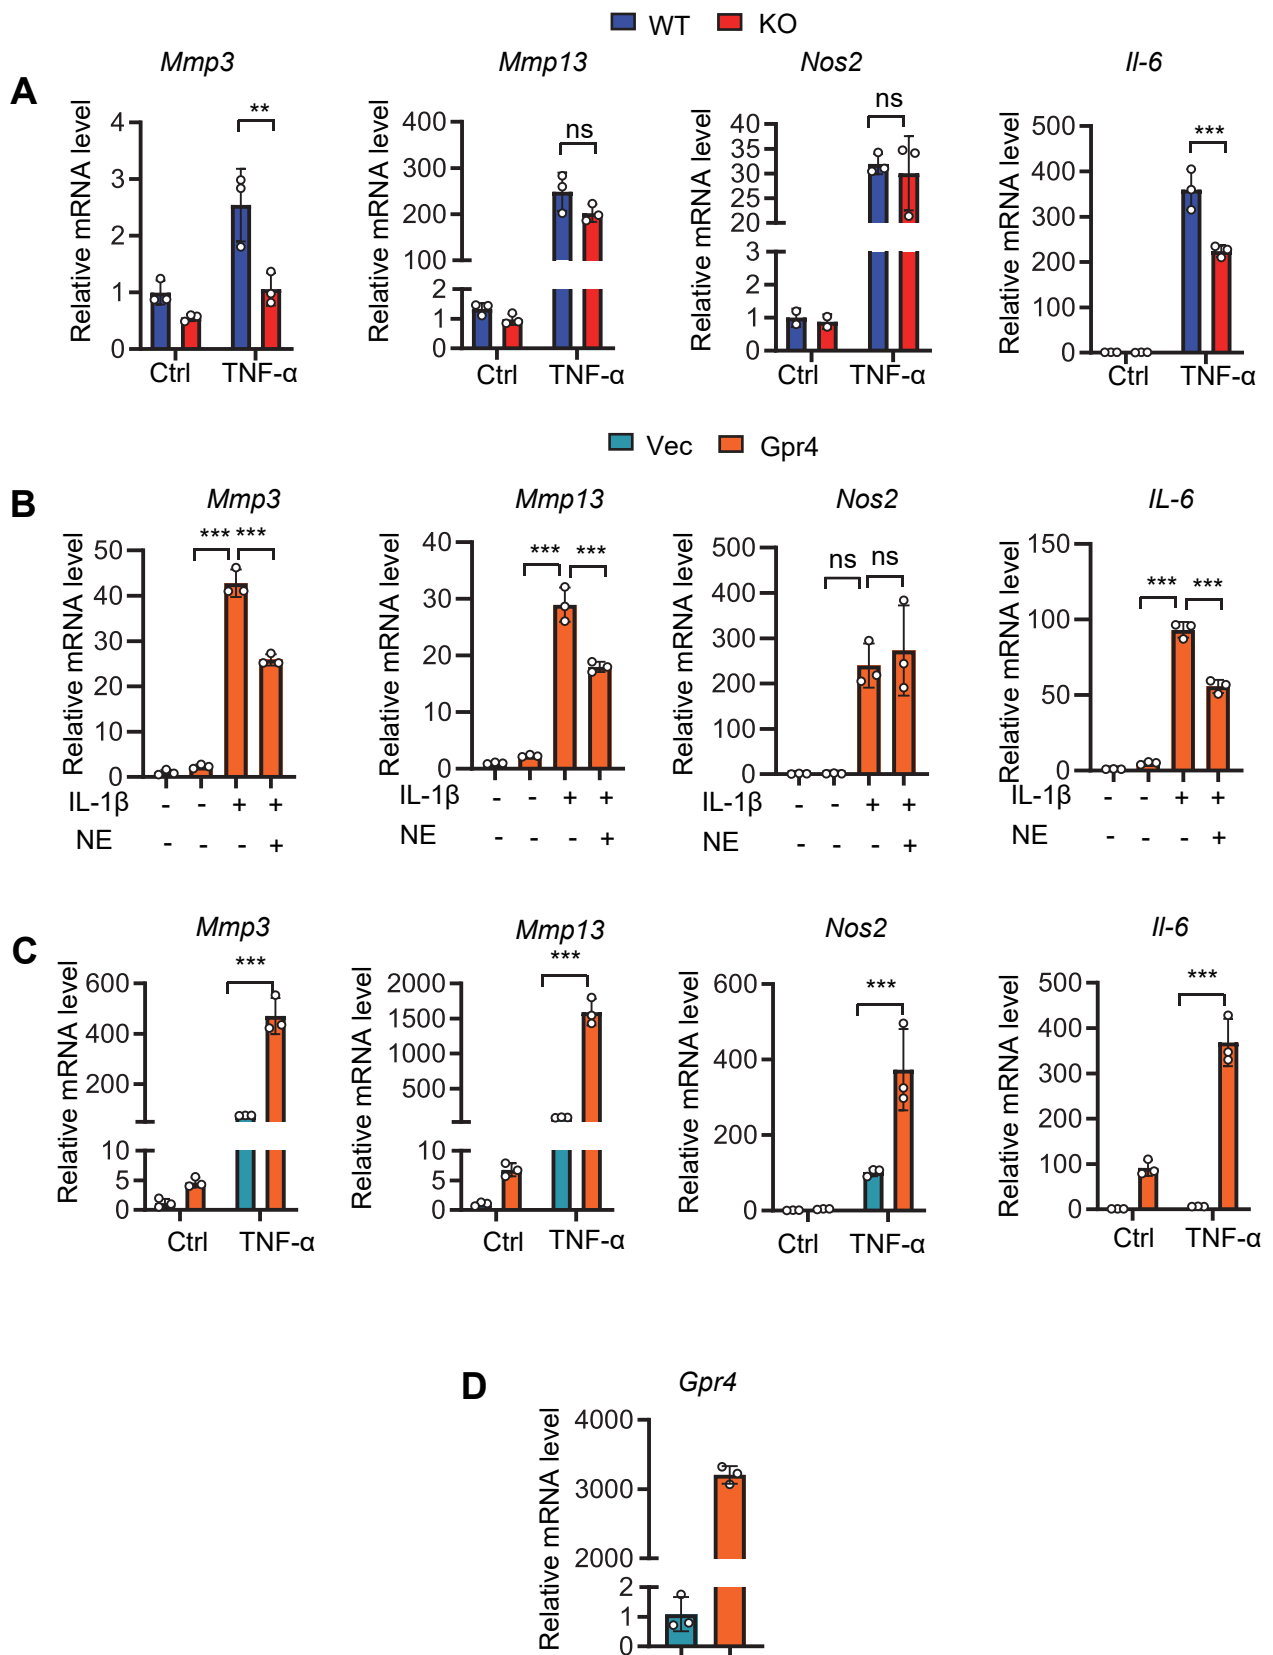



Li et al., Supplementary Fig. 5

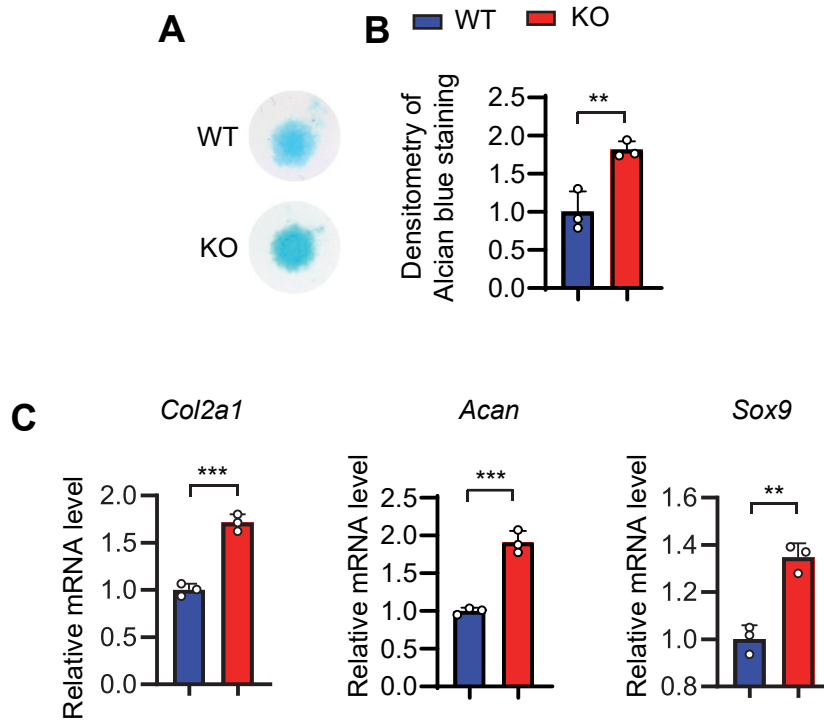



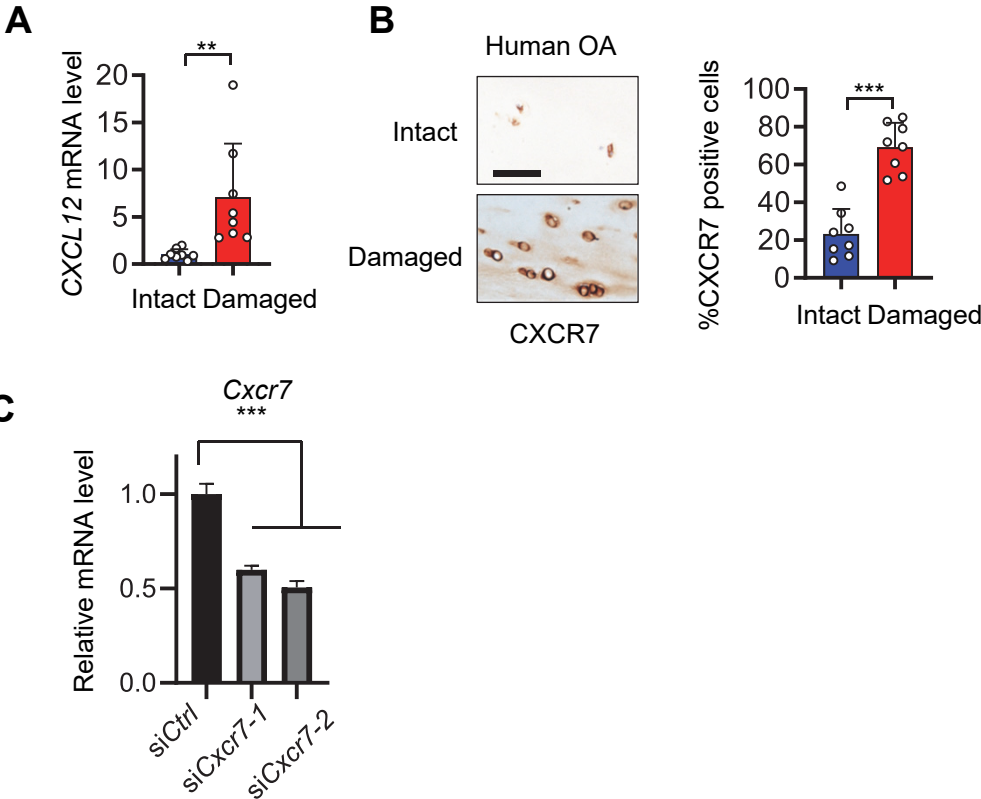

Supplement: 41419_2021_4455_MOESM1_ESM.pdf [file 41419_2021_4455_MOESM1_ESM.pdf]
